# Supplementary material
Source: PubMed Central journal article supplement (PMC5073241)
Supplement: Supp_Figure1.pdf [file Supp_Figure1.pdf]

## Supplementary Data

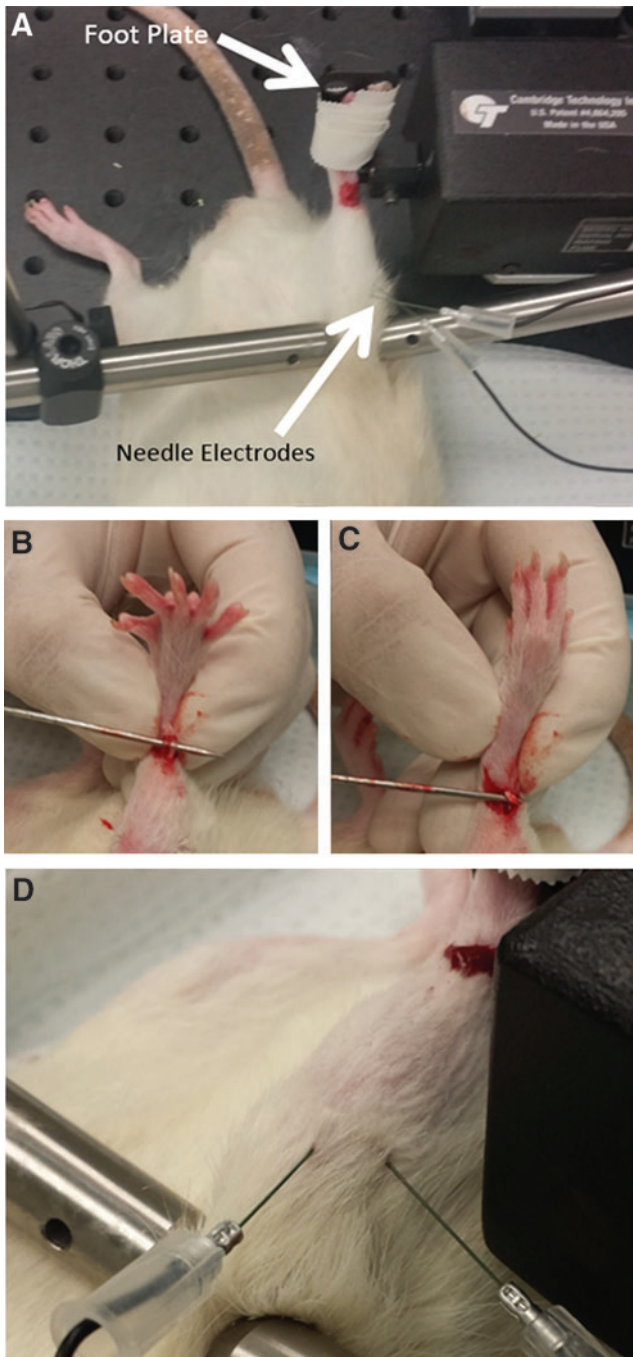

**SUPPLEMENTARY FIG. S1.** To record peak tetanic contractile force, the hind foot of an anesthetized rat secured to a foot plate with the knee was immobilized at 90° (A). A tenotomy was performed on the distal tendons of the extensor digitorum longus and extensor hallucis longus (B, C) to isolate the contribution of tibialis anterior muscle to force production. Needle electrodes were used to stimulate the peroneal nerve (D). During stimulation, ankle dorsiflexion force in Newton's versus time was recorded.
