# Supplementary material
Source: PubMed Central journal article supplement (PMC5073241)
Supplement: Supp_Table1.pdf [file Supp_Table1.pdf]

SUPPLEMENTARY TABLE S1. TAQMAN PRIMER  
REFERENCE ID'S

| <i>Target</i>                 | <i>Reference ID</i> |
|-------------------------------|---------------------|
| <i>Col 1a1</i>                | Rn00564113_m1       |
| <i>Col IIIa1</i>              | Rn01437681_m1       |
| <i>TGF-<math>\beta</math></i> | Rn00572010_m1       |
| <i>MyoD</i>                   | Rn00598571_m1       |
| <i>TIMP-1</i>                 | Rn01430873_g1       |
| <i>MMP2</i>                   | Rn01538170-m1       |
| <i>18s</i>                    | Rn03928990_g1       |
